# Supplementary material for: Trends in Cannabis Polysubstance Use During Early Pregnancy Among Patients in a Large Health Care System in Northern California
Source: PubMed Central journal article supplement (PMC9171564; doi:10.1001/jamanetworkopen.2022.15418), 2022-06-06
Supplement: jamanetwopen-e2215418-s001.pdf [file jamanetwopen-e2215418-s001.pdf]

## Supplementary Online Content

Young-Wolff KC, Sarovar V, Tucker LY, et al. Trends in cannabis polysubstance use during early pregnancy among patients in a large health care system in Northern California. *JAMA Netw Open*. 2022;5(6):e2215418.  
doi:10.1001/jamanetworkopen.2022.15418

**eAppendix.** Urine Toxicology Testing Description and Positive Cutoffs

**eTable 1.** Prevalence of Cannabis Use and Polysubstance Use During Early Pregnancy in KPNC by Sociodemographics, 2009-2018 (N = 367,138)

**eTable 2.** Adjusted Prevalence and Annual Relative Rate of Change of Cannabis, Alcohol, Nicotine, Pharmaceutical Opioid, and Stimulant Use During Early Pregnancy in KPNC, 2009-2018 (N = 367,138)

**eTable 3.** Sensitivity Analysis of Adjusted Prevalence and Annual Relative Rate of Change of Cannabis Use During Early Pregnancy in KPNC for Each Year (2009-2018), by Polysubstance Use (N = 367,138)

This supplementary material has been provided by the authors to give readers additional information about their work.

**eAppendix.** Urine Toxicology Testing Description and Positive Cutoffs

**Cannabis:** Cannabis screening tests were performed on a Beckman Coulter AU680 chemistry analyzer using the Emit II Plus Cannabinoid Assay from Siemens with a cutoff of 45ng/mL.

Confirmatory testing for the presence of the cannabis metabolite, 11-nor-9-carboxy-delta 9- THC, was performed by liquid chromatography-tandem mass spectrometry for all positive immunoassay results.

The confirmation test methodology was LC-MS/MS on a triple quadrupole system with a cutoff for positivity of 15ng/mL.

**Alcohol:** Alcohol screening tests were performed on a Beckman Coulter AU680 chemistry analyzer using the Emit II Plus Ethyl Alcohol Assay from Siemens with a cutoff of 10 mg/dL. Confirmatory testing for the presence of ethanol was performed by gas chromatography-mass spectrometry for all positive immunoassay results, also with a positive cutoff of 10 mg/dL.

**Pharmaceutical Opioids:** Opiate screening tests were performed on a Beckman Coulter AU680 chemistry analyzer using the Emit II Plus Opiate 300 Assay from Siemens with a cutoff of 300 ng/mL. Confirmatory testing for the presence of opiate species was performed by liquid chromatography-tandem mass spectrometry for all positive immunoassay results. Opiate species detected by the confirmation assay include morphine, codeine, hydrocodone, norhydrocodone, hydromorphone, oxycodone, noroxycodone, and oxymorphone. All species have a positive cutoff of 50 ng/mL.

**Amphetamine/Methamphetamine:** Amphetamines screening tests were performed on a Beckman Coulter AU680 chemistry analyzer using the DRI Amphetamines Assay with a cutoff of 500 ng/mL. Confirmatory testing for the presence of amphetamine species was performed by liquid

chromatography- tandem mass spectrometry for all positive immunoassay results. Amphetamine species detected by the confirmation assay include amphetamine and methamphetamine. All species have a positive cutoff of 250 ng/mL.

**Cocaine:** Cocaine screening tests were performed on a Beckman Coulter AU680 chemistry analyzer using the Emit II Plus Cocaine Metabolite Assay which detects the cocaine metabolite benzoylecgonine with a positive cutoff of 150 ng/mL. Confirmatory testing for the presence of benzoylecgonine was performed by liquid chromatography- tandem mass spectrometry for all positive immunoassay results. The positive cutoff for the confirmation assay was 100 ng/mL.

**eTable 1.** Prevalence of Cannabis Use and Polysubstance Use During Early Pregnancy in KPNC by Sociodemographics, 2009-2018 (N = 367,138)

| Characteristics                                             | Total<br>N (%) =<br>367,138<br>(100.0) | Any Cannabis Use                |                                | Number of Co-Occurring Substances        |                                          |                                                                |                                                         |
|-------------------------------------------------------------|----------------------------------------|---------------------------------|--------------------------------|------------------------------------------|------------------------------------------|----------------------------------------------------------------|---------------------------------------------------------|
|                                                             |                                        | No<br>n (%) = 344,893<br>(93.9) | Yes<br>n (%) = 22,245<br>(6.1) | No Cannabis<br>n (%) = 344,893<br>(93.9) | Cannabis Only<br>n (%) = 15,488<br>(4.2) | Cannabis and 1<br>other<br>Substance<br>n (%) = 4,984<br>(1.4) | Cannabis and ≥2<br>Substances<br>n (%) = 1,773<br>(0.5) |
| <b>Age, Years</b>                                           |                                        |                                 |                                |                                          |                                          |                                                                |                                                         |
| 11-17                                                       | 4,170 (1.1)                            | 3,427 (82.2)                    | 743 (17.8)                     | 3,427 (82.2)                             | 510 (12.2)                               | 168 (4.0)                                                      | 65 (1.6)                                                |
| 18-24                                                       | 54,639 (14.9)                          | 46,079 (84.3)                   | 8,560 (15.7)                   | 46,079 (84.3)                            | 6,133 (11.2)                             | 1,729 (3.2)                                                    | 698 (1.3)                                               |
| 25-34                                                       | 227,226 (61.9)                         | 216,740 (95.4)                  | 10,486 (4.6)                   | 216,740 (95.4)                           | 7,257 (3.2)                              | 2,427 (1.1)                                                    | 802 (0.4)                                               |
| ≥35                                                         | 81,103 (22.1)                          | 78,647 (97.0)                   | 2,456 (3.0)                    | 78,647 (97.0)                            | 1,588 (2.0)                              | 660 (0.8)                                                      | 208 (0.3)                                               |
| <b>Race/Ethnicity</b>                                       |                                        |                                 |                                |                                          |                                          |                                                                |                                                         |
| White                                                       | 139,616 (38.0)                         | 130,816 (93.7)                  | 8,800 (6.3)                    | 130,816 (93.7)                           | 5,742 (4.1)                              | 2,210 (1.6)                                                    | 848 (0.6)                                               |
| Black                                                       | 24,378 (6.6)                           | 19,158 (78.6)                   | 5,220 (21.4)                   | 19,158 (78.6)                            | 3,921 (16.1)                             | 1,001 (4.1)                                                    | 298 (1.2)                                               |
| Asian/Pacific Islander                                      | 95,168 (25.9)                          | 93,932 (98.7)                   | 1,236 (1.3)                    | 93,932 (98.7)                            | 749 (0.8)                                | 337 (0.4)                                                      | 150 (0.2)                                               |
| Hispanic                                                    | 94,740 (25.8)                          | 88,937 (93.9)                   | 5,803 (6.1)                    | 88,937 (93.9)                            | 4,250 (4.5)                              | 1,165 (1.2)                                                    | 388 (0.4)                                               |
| Other/Unknown                                               | 13,236 (3.6)                           | 12,050 (91.0)                   | 1,186 (9.0)                    | 12,050 (91.0)                            | 826 (6.2)                                | 271 (2.1)                                                      | 89 (0.7)                                                |
| <b>Median Neighborhood Household<br/>Income<sup>a</sup></b> |                                        |                                 |                                |                                          |                                          |                                                                |                                                         |
| <51,563                                                     | 91,589 (25.0)                          | 82,769 (90.4)                   | 8,820 (9.6)                    | 82,769 (90.4)                            | 6,409 (7.0)                              | 1,819 (2.0)                                                    | 592 (0.7)                                               |
| 51,563 - <70,455                                            | 91,574 (24.9)                          | 85,749 (93.6)                   | 5,825 (6.4)                    | 85,749 (93.6)                            | 4,036 (4.4)                              | 1,319 (1.4)                                                    | 470 (0.5)                                               |
| 70,455 - <92,625                                            | 91,569 (24.9)                          | 87,133 (95.2)                   | 4,436 (4.8)                    | 87,133 (95.2)                            | 2,976 (3.3)                              | 1,055 (1.2)                                                    | 405 (0.4)                                               |
| ≥ 92,625                                                    | 91,602 (25.0)                          | 88,491 (96.6)                   | 3,111 (3.4)                    | 88,491 (96.6)                            | 2,040 (2.2)                              | 773 (0.8)                                                      | 298 (0.3)                                               |

Notes. <sup>a</sup>Data on neighborhood median household income was missing for 804 (0.2%) pregnancies.

**eTable 2.** Adjusted Prevalence and Annual Relative Rate of Change of Cannabis, Alcohol, Nicotine, Pharmaceutical Opioid, and Stimulant Use During Early Pregnancy in KPNC, 2009-2018 (N = 367,138)

| Any use                             | Adjusted prevalence of any substance use during pregnancy, % (95% CI) <sup>a</sup> |                        |                        |                       |                     |                     |                     |                     |                     |                        | Linear trend estimation                          |         |
|-------------------------------------|------------------------------------------------------------------------------------|------------------------|------------------------|-----------------------|---------------------|---------------------|---------------------|---------------------|---------------------|------------------------|--------------------------------------------------|---------|
|                                     | 2009                                                                               | 2010                   | 2011                   | 2012                  | 2013                | 2014                | 2015                | 2016                | 2017                | 2018                   | Annual relative rate of change estimate (95% CI) | P value |
| Alcohol                             | 11.73<br>(11.31-12.14)                                                             | 10.72<br>(10.32-11.12) | 10.55<br>(10.15-10.94) | 10.08<br>(9.70-10.46) | 9.57<br>(9.20-9.93) | 8.98<br>(8.63-9.32) | 8.91<br>(8.58-9.25) | 8.00<br>(7.68-8.31) | 8.84<br>(8.52-9.17) | 10.86<br>(10.51-11.20) | 0.98<br>(0.97-0.98)                              | <.001   |
|                                     | Annual relative rate                                                               | 0.91<br>(0.87-0.96)    | 0.98<br>(0.93-1.04)    | 0.96<br>(0.91-1.01)   | 0.95<br>(0.90-1.00) | 0.94<br>(0.89-0.99) | 0.99<br>(0.94-1.05) | 0.90<br>(0.85-0.95) | 1.11<br>(1.05-1.17) | 1.23<br>(1.17-1.29)    |                                                  |         |
| Cannabis                            | 4.14<br>(3.85-4.43)                                                                | 4.55<br>(4.24-4.85)    | 5.06<br>(4.74-5.39)    | 5.16<br>(4.83-5.48)   | 5.38<br>(5.04-5.71) | 5.98<br>(5.63-6.33) | 6.43<br>(6.08-6.79) | 6.81<br>(6.45-7.17) | 7.76<br>(7.38-8.15) | 8.73<br>(8.33-9.12)    | 1.08<br>(1.08-1.09)                              | <.001   |
|                                     | Annual relative rate                                                               | 1.10<br>(1.00-1.21)    | 1.11<br>(1.01-1.22)    | 1.02<br>(0.93-1.12)   | 1.04<br>(0.95-1.14) | 1.11<br>(1.02-1.21) | 1.08<br>(0.99-1.17) | 1.06<br>(0.98-1.14) | 1.14<br>(1.06-1.23) | 1.12<br>(1.05-1.20)    |                                                  |         |
| Nicotine                            | 4.21<br>(3.95-4.48)                                                                | 3.54<br>(3.29-3.78)    | 3.45<br>(3.21-3.69)    | 3.03<br>(2.80-3.25)   | 2.91<br>(2.68-3.13) | 2.61<br>(2.40-2.81) | 2.33<br>(2.14-2.52) | 2.21<br>(2.03-2.39) | 1.98<br>(1.81-2.15) | 2.06<br>(1.89-2.22)    | 0.92<br>(0.91-0.93)                              | <.001   |
|                                     | Annual relative rate                                                               | 0.84<br>(0.76-0.92)    | 0.98<br>(0.88-1.08)    | 0.88<br>(0.79-0.97)   | 0.96<br>(0.86-1.07) | 0.90<br>(0.80-1.00) | 0.89<br>(0.80-1.00) | 0.95<br>(0.84-1.06) | 0.90<br>(0.80-1.01) | 1.04<br>(0.92-1.17)    |                                                  |         |
| Pharmaceutical opioids <sup>b</sup> | 0.52<br>(0.45-0.58)                                                                | 0.43<br>(0.37-0.49)    | 0.47<br>(0.40-0.53)    | 0.48<br>(0.42-0.55)   | 0.53<br>(0.46-0.59) | 0.48<br>(0.42-0.55) | 0.48<br>(0.42-0.53) | 0.38<br>(0.33-0.43) | 0.26<br>(0.22-0.31) | 0.22<br>(0.19-0.26)    | 0.94<br>(0.92-0.95)                              | <.001   |
|                                     | Annual relative rate                                                               | 0.84<br>(0.69-1.02)    | 1.08<br>(0.89-1.31)    | 1.04<br>(0.86-1.26)   | 1.09<br>(0.91-1.30) | 0.92<br>(0.77-1.10) | 0.98<br>(0.82-1.17) | 0.80<br>(0.66-0.96) | 0.70<br>(0.56-0.86) | 0.85<br>(0.67-1.07)    |                                                  |         |
| Stimulants <sup>c</sup>             | 0.34<br>(0.28-0.40)                                                                | 0.29<br>(0.24-0.35)    | 0.34<br>(0.28-0.40)    | 0.33<br>(0.27-0.38)   | 0.33<br>(0.28-0.39) | 0.41<br>(0.35-0.48) | 0.37<br>(0.31-0.43) | 0.39<br>(0.33-0.45) | 0.43<br>(0.37-0.50) | 0.48<br>(0.42-0.55)    | 1.05<br>(1.03-1.06)                              | <.001   |
|                                     | Annual relative rate                                                               | 0.86<br>(0.67-1.11)    | 1.17<br>(0.91-1.50)    | 0.95<br>(0.74-1.22)   | 1.03<br>(0.80-1.32) | 1.23<br>(0.98-1.55) | 0.91<br>(0.73-1.13) | 1.05<br>(0.84-1.31) | 1.11<br>(0.90-1.36) | 1.11<br>(0.91-1.35)    |                                                  |         |

Notes. <sup>a</sup>Adjusted prevalence estimates and 95% confidence intervals (CIs) were estimated from Poisson regression models controlling for age group, race/ethnicity and median neighborhood household income (extracted from electronic health record). <sup>b</sup>Pharmaceutical opioid use is based on a urine toxicology test. <sup>c</sup>Stimulant use is based on a combination of self-report (cocaine and methamphetamine) and/or toxicology testing (cocaine and methamphetamine/amphetamine).

**eTable 3.** Sensitivity Analysis of Adjusted Prevalence and Annual Relative Rate of Change of Cannabis Use During Early Pregnancy in KPNC for Each Year (2009-2018), by Polysubstance Use (N = 367,138)

| Substance Use                                                         | Adjusted Prevalence of Cannabis and Co-Occurring Substance Use During Pregnancy, % (95% CI) <sup>a</sup> |                     |                     |                     |                     |                     |                     |                     |                     |                     | Linear Trend Estimation                          |         |
|-----------------------------------------------------------------------|----------------------------------------------------------------------------------------------------------|---------------------|---------------------|---------------------|---------------------|---------------------|---------------------|---------------------|---------------------|---------------------|--------------------------------------------------|---------|
|                                                                       | 2009                                                                                                     | 2010                | 2011                | 2012                | 2013                | 2014                | 2015                | 2016                | 2017                | 2018                | Annual Relative Rate of Change Estimate (95% CI) | P value |
| <b>Number of Co-Occurring Substances</b>                              |                                                                                                          |                     |                     |                     |                     |                     |                     |                     |                     |                     |                                                  |         |
| Cannabis Only                                                         | 2.43<br>(2.23-2.62)                                                                                      | 2.89<br>(2.67-3.10) | 3.25<br>(3.02-3.48) | 3.37<br>(3.14-3.60) | 3.66<br>(3.42-3.91) | 4.27<br>(4.01-4.53) | 4.73<br>(4.46-4.99) | 5.13<br>(4.85-5.40) | 5.89<br>(5.59-6.18) | 6.32<br>(6.02-6.62) |                                                  |         |
|                                                                       | Annual relative rate                                                                                     | 1.19<br>(1.07-1.33) | 1.13<br>(1.02-1.25) | 1.04<br>(0.94-1.14) | 1.09<br>(0.99-1.20) | 1.17<br>(1.06-1.28) | 1.11<br>(1.02-1.20) | 1.08<br>(1.00-1.17) | 1.15<br>(1.07-1.24) | 1.07<br>(1.00-1.15) | 1.11<br>(1.10-1.12)                              | <.001   |
| Cannabis and 1 Other Substance <sup>b,c</sup>                         | 1.17<br>(1.04-1.29)                                                                                      | 1.15<br>(1.02-1.27) | 1.27<br>(1.14-1.40) | 1.26<br>(1.13-1.39) | 1.27<br>(1.14-1.40) | 1.29<br>(1.16-1.42) | 1.30<br>(1.17-1.43) | 1.28<br>(1.15-1.41) | 1.45<br>(1.32-1.59) | 1.92<br>(1.77-2.07) |                                                  |         |
|                                                                       | Annual relative rate                                                                                     | 0.98<br>(0.84-1.14) | 1.11<br>(0.95-1.29) | 1.00<br>(0.86-1.15) | 1.01<br>(0.87-1.17) | 1.01<br>(0.87-1.17) | 1.01<br>(0.88-1.16) | 0.98<br>(0.86-1.13) | 1.14<br>(0.99-1.30) | 1.32<br>(1.17-1.49) | 1.04<br>(1.03-1.06)                              | <.001   |
| Cannabis and ≥2 Other Substances <sup>b,c</sup>                       | 0.55<br>(0.47-0.62)                                                                                      | 0.52<br>(0.44-0.59) | 0.54<br>(0.46-0.62) | 0.52<br>(0.45-0.60) | 0.44<br>(0.37-0.51) | 0.43<br>(0.36-0.49) | 0.41<br>(0.34-0.47) | 0.40<br>(0.34-0.46) | 0.42<br>(0.36-0.49) | 0.49<br>(0.42-0.56) |                                                  |         |
|                                                                       | Annual relative rate                                                                                     | 0.94<br>(0.77-1.16) | 1.05<br>(0.85-1.28) | 0.97<br>(0.79-1.19) | 0.85<br>(0.68-1.05) | 0.96<br>(0.77-1.21) | 0.96<br>(0.76-1.20) | 0.98<br>(0.78-1.23) | 1.06<br>(0.85-1.32) | 1.15<br>(0.93-1.42) | 0.97<br>(0.96-0.99)                              | 0.001   |
| <b>Type of Co-Occurring Substance Use</b>                             |                                                                                                          |                     |                     |                     |                     |                     |                     |                     |                     |                     |                                                  |         |
| Cannabis Only                                                         | 2.43<br>(2.23-2.62)                                                                                      | 2.89<br>(2.67-3.10) | 3.25<br>(3.02-3.48) | 3.37<br>(3.14-3.60) | 3.66<br>(3.42-3.91) | 4.27<br>(4.01-4.53) | 4.73<br>(4.46-4.99) | 5.13<br>(4.85-5.40) | 5.89<br>(5.59-6.18) | 6.32<br>(6.02-6.62) |                                                  |         |
|                                                                       | Annual relative rate                                                                                     | 1.19<br>(1.07-1.33) | 1.13<br>(1.02-1.25) | 1.04<br>(0.94-1.14) | 1.09<br>(0.99-1.20) | 1.17<br>(1.06-1.28) | 1.11<br>(1.02-1.20) | 1.08<br>(1.00-1.17) | 1.15<br>(1.07-1.24) | 1.07<br>(1.00-1.15) | 1.11<br>(1.10-1.12)                              | <.001   |
| Cannabis and Alcohol                                                  | 1.11<br>(0.99-1.23)                                                                                      | 1.08<br>(0.96-1.21) | 1.14<br>(1.01-1.27) | 1.16<br>(1.03-1.28) | 1.13<br>(1.01-1.26) | 1.12<br>(0.99-1.24) | 1.10<br>(0.98-1.22) | 1.07<br>(0.96-1.19) | 1.35<br>(1.22-1.48) | 1.87<br>(1.73-2.02) |                                                  |         |
|                                                                       | Annual relative rate                                                                                     | 0.97<br>(0.83-1.14) | 1.05<br>(0.90-1.23) | 1.02<br>(0.87-1.19) | 0.98<br>(0.84-1.14) | 0.99<br>(0.84-1.15) | 0.99<br>(0.85-1.15) | 0.97<br>(0.84-1.13) | 1.26<br>(1.09-1.45) | 1.39<br>(1.23-1.57) | 1.04<br>(1.03-1.06)                              | <.001   |
| Cannabis and Nicotine                                                 | 1.05<br>(0.93-1.16)                                                                                      | 0.97<br>(0.86-1.09) | 1.05<br>(0.93-1.17) | 0.99<br>(0.88-1.11) | 0.90<br>(0.79-1.01) | 0.88<br>(0.77-0.98) | 0.85<br>(0.74-0.95) | 0.84<br>(0.74-0.94) | 0.78<br>(0.68-0.88) | 0.83<br>(0.73-0.92) |                                                  |         |
|                                                                       | Annual relative rate                                                                                     | 0.93<br>(0.79-1.09) | 1.07<br>(0.91-1.26) | 0.95<br>(0.81-1.11) | 0.91<br>(0.77-1.07) | 0.98<br>(0.82-1.16) | 0.96<br>(0.81-1.15) | 0.99<br>(0.84-1.18) | 0.93<br>(0.78-1.10) | 1.06<br>(0.89-1.26) | 0.97<br>(0.96-0.98)                              | <.001   |
| Cannabis and Illicit/Unauthorized Pharmaceutical Opioids <sup>b</sup> | 0.01<br>(0.01-0.02)                                                                                      | 0.03<br>(0.02-0.04) | 0.02<br>(0.01-0.03) | 0.03<br>(0.02-0.05) | 0.05<br>(0.03-0.06) | 0.05<br>(0.04-0.06) | 0.06<br>(0.04-0.07) | 0.05<br>(0.03-0.06) | 0.04<br>(0.03-0.06) | 0.04<br>(0.03-0.06) |                                                  |         |

|                                                                 |                      |                     |                     |                     |                     |                     |                     |                     |                     |                     |                     |       |
|-----------------------------------------------------------------|----------------------|---------------------|---------------------|---------------------|---------------------|---------------------|---------------------|---------------------|---------------------|---------------------|---------------------|-------|
|                                                                 | Annual relative rate | 1.82<br>(0.96-3.45) | 0.90<br>(0.52-1.58) | 1.44<br>(0.85-2.44) | 1.36<br>(0.88-2.11) | 1.07<br>(0.72-1.59) | 1.18<br>(0.82-1.71) | 0.80<br>(0.56-1.16) | 0.94<br>(0.64-1.38) | 1.00<br>(0.68-1.47) | 1.09<br>(1.06-1.13) | <.001 |
| Cannabis and<br>Illicit/Unauthorized<br>Stimulants <sup>c</sup> | 0.16<br>(0.12-0.20)  | 0.15<br>(0.11-0.18) | 0.20<br>(0.16-0.24) | 0.17<br>(0.13-0.20) | 0.15<br>(0.11-0.18) | 0.17<br>(0.13-0.21) | 0.18<br>(0.14-0.22) | 0.17<br>(0.14-0.21) | 0.18<br>(0.14-0.22) | 0.21<br>(0.17-0.25) |                     |       |
|                                                                 | Annual relative rate | 0.90<br>(0.65-1.26) | 1.37<br>(0.99-1.88) | 0.84<br>(0.62-1.14) | 0.89<br>(0.64-1.23) | 1.17<br>(0.84-1.62) | 1.03<br>(0.75-1.39) | 0.98<br>(0.72-1.33) | 1.05<br>(0.78-1.42) | 1.14<br>(0.86-1.51) | 1.02<br>(1.00-1.05) | 0.070 |

Notes. <sup>a</sup>Adjusted prevalence estimates and 95% CIs were estimated from Poisson regression models controlling for age group, race/ethnicity, and median neighborhood household income (extracted from the electronic health record). <sup>b</sup>Illicit/unauthorized pharmaceutical opioid use was defined as having a positive screen for prescription opioid use by urine toxicology and not having a prescription for an opioid filled during the 90 days prior to the screening date. <sup>c</sup>Illicit/unauthorized stimulant use was defined as (1) cocaine and/or methamphetamine use by self-report and/or urine toxicology testing, and/or (2) a positive toxicology test for amphetamines and no prescription for an amphetamine filled during the 90 days prior to the screening date.
